# Supplementary material
Source: publisher site journal article supplement (https://www.degruyterbrill.com/publication/isbn/9783110557503/downloadAsset/9783110557503_Errata.pdf)
Supplement: Supplementary file 1 [file 9783110557503_Errata.pdf]

## Errata zur dritten Auflage des Buches:

" Chemische Thermodynamik" (ISBN 978-3-11-055747-3, De Gruyter, Januar 2018)

Leider bleibt es selbst bei sorgfältigster Recherche nicht aus, dass sich in einem Buch einige Fehler und Versäumnisse einschleichen, für die der Autor um Entschuldigung und Nachsicht bittet.

### Markierte Richtigstellungen

- S.171 Korrektur der angegebenen Maßeinheit für  $T_0$  :  $\rightarrow T_0 = 273,15 \text{ K}$
- S.228 Nr. 90, Zeile 14 v.o.:  $\rightarrow$  Teil **statt** Teile
- S.249 Nr. 111f Zeile 12 v.o.:  $\rightarrow 1,4 \text{ cm}^3$
- S.335 Nr. 151.3 Zeile 5 v.u. :  $\rightarrow$  ...der in 1.) errechneten...
- S.336 Nr.157 Zeile 1:  $\rightarrow 157.1 \quad 157.2$
- S.346 Nr.185.2 Zeile 5 v.o.:  $\rightarrow$  ...Vergleich zu 185.1 **statt** zu 177.1
- S.406 Nr.52 1d) Fehl. Angabe in 4. Gleich. links :  $\rightarrow w_{12}$
- S.413 In Beschriftung Abb.5.5 :  $\rightarrow T_k^*$  Temp. dicht unterhalb (ca. 6K) von  $T_k$
- S.479 Nr.154 Fehl. Zeile in Tab. :  $\rightarrow \Delta_R F = \Delta_R G - \Delta n RT \quad \begin{array}{ll} 84,37 \text{ kJ/mol} & 11,022 \text{ kJ/mol} \\ 2,11 \text{ kJ/mol} & -4,44 \text{ kJ/mol} \end{array}$
- S.504 Nr. 183 Korrektur im zu lösenden Bruch :  $\rightarrow K_\chi = \frac{0,23 \cdot 2,54^2}{1,54^2 \cdot 0,77} = 0,8126$
- S.518 Nr. 199c Zeile 3 Fehl. Minuszeichen :  $\rightarrow \Delta_R G^0 = -320,33 \text{ kJ/mol}$
- S.535 Nr. 221 Zeile 9 :  $\rightarrow$  Verweis auf Abb. 5.46
